# Supplementary material for: Public attitudes in Japan toward the reproductive use of gametes derived from human-induced pluripotent stem cells
Source: Future Sci OA. 2021 Oct 22;7(10):FSO754. doi: 10.2144/fsoa-2021-0065 (PMC8609981; doi:10.2144/fsoa-2021-0065)
Supplement: Supplementary file 2 [file fsoa-07-754-s2.xlsx]

## Sheet: Suppl Table 1
	Suppl. Table 1. Comparison between a subgroup of respondents aged 49 or younger that had undergone infertility treatment, and another group of all the other respondents regarding personal preferences in using IVD-gametes for reproduction
			I want to use ita	I do not want to use itb	I don’t know
	Do you want to use IVD-gametes to produce children? C	Infertility treatment experience & 49 years of age or younger (n = 139)	34	97	8
		Others (n = 2,957)	453	2066	438
	a: Respondents who answered either “I strongly want to use it” or “I want to use it” to this question. b: Respondents who answered either “I never want to use it” or “I do not want to use it” to this question. c: A difference in the distributions of responses was observed between the subgroup of respondents aged 49 or younger and having undergone infertility treatments (n = 139) and the subgroup …
