# Supplementary material for: Public attitudes in Japan toward the reproductive use of gametes derived from human-induced pluripotent stem cells
Source: Future Sci OA. 2021 Oct 22;7(10):FSO754. doi: 10.2144/fsoa-2021-0065 (PMC8609981; doi:10.2144/fsoa-2021-0065)
Supplement: Supplementary file 3 [file fsoa-07-754-s3.xlsx]

## Sheet: Suppl Table 2
	Suppl. Table 2. Comparison between a subgroup of respondents aged 49 or younger that had undergone infertility treatments and another group of all other respondents regarding acceptance by purposes
			I agreea	I disagreeb	I don’t know
	To use this technology to enable conceptionc	Infertility treatment experience & 49 years of age or younger (n = 139)	105	25	9
		Others (n = 2,957)	1485	939	533
	To avoid passing hereditary disorders to the childd	Infertility treatment experience & 49 years of age or younger (n = 139)	94	27	18
		Others (n = 2,957)	1689	727	541
	To produce children resistant to diseasese	Infertility treatment experience & 49 years of age or younger (n = 139)	67	57	15
		Others (n = 2,957)	1174	1208	575
	To produce children with specific appearance or abilitiesf	Infertility treatment experience & 49 years of age or younger (n = 139)	34	97	8
		Others (n = 2,957)	453	2066	438
	a: Respondents who answered either “I agree” or “I strongly agree” to each item. b: Respondents who answered either “I disagree” or “I strongly disagree” to each item. c: A difference in the distributions of responses was observed between the subgroup of respondents aged 49 or younger that had undergone infertility treatments (n = 139) and the subgroup of all other respondents (n = 2,957) (x2 = 3…
